# Supplementary material for: The gut microbiota metabolite urolithin A inhibits NF-κB activation in LPS stimulated BMDMs
Source: PubMed Central journal article supplement (PMC8007722; doi:10.1038/s41598-021-86514-6), 2021-03-29
Supplement: 41598_2021_86514_MOESM1_ESM.pdf [file 41598_2021_86514_MOESM1_ESM.pdf]

# **The gut microbiota metabolite urolithin A inhibits NF- $\kappa$ B activation in LPS stimulated BMDMs**

Khalid N. M. Abdelazeem<sup>1,2</sup>, M. Zaher Kalo<sup>3</sup>, Sandra Beer-Hammer\*<sup>3</sup> & Florian Lang<sup>1</sup>

<sup>1</sup>Department of Internal Medicine III, Eberhard Karls University of Tübingen, Tübingen, Germany

<sup>2</sup>Radiation Biology Research Department, National Centre for Radiation Research and Technology, Atomic Energy Authority, Cairo, Egypt,

<sup>3</sup>Department of Pharmacology, Experimental Therapy & Toxicology, Institute of Experimental and Clinical Pharmacology and Pharmacogenomic, University of Tübingen, Wilhelmstrasse 56, 72074 Tübingen, Germany

## **\*Corresponding author:**

**Professor Sandra Beer-Hammer**, Department of Pharmacology, Experimental Therapy & Toxicology, Institute of Experimental and Clinical Pharmacology and Pharmacogenomic, University of Tübingen, Wilhelmstrasse 56, 72074 Tübingen, Germany

Telefon +49 7071 29-74594,

Telefax +49 7071 29-4942

E-Mail; [sandra.beer-hammer@uni-tuebingen.de](mailto:sandra.beer-hammer@uni-tuebingen.de)

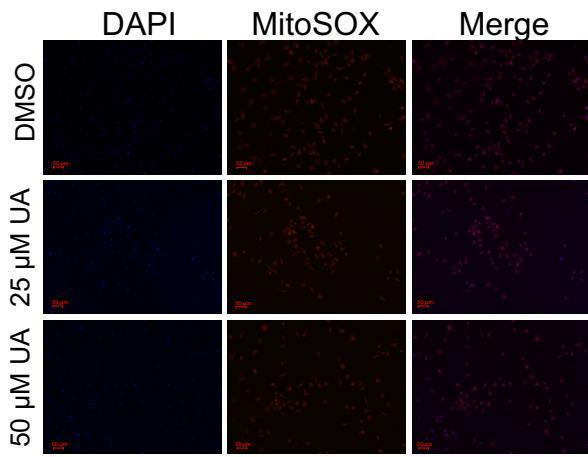

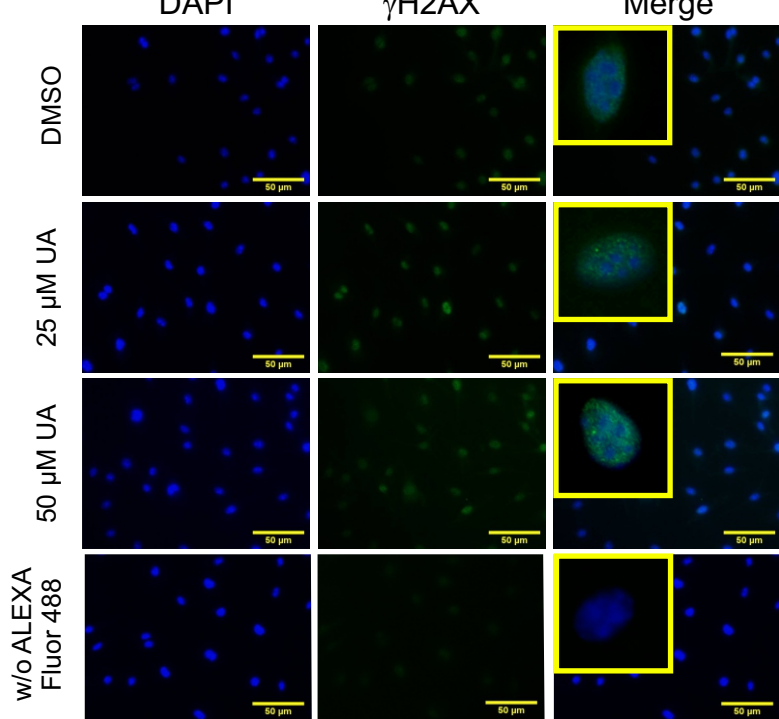

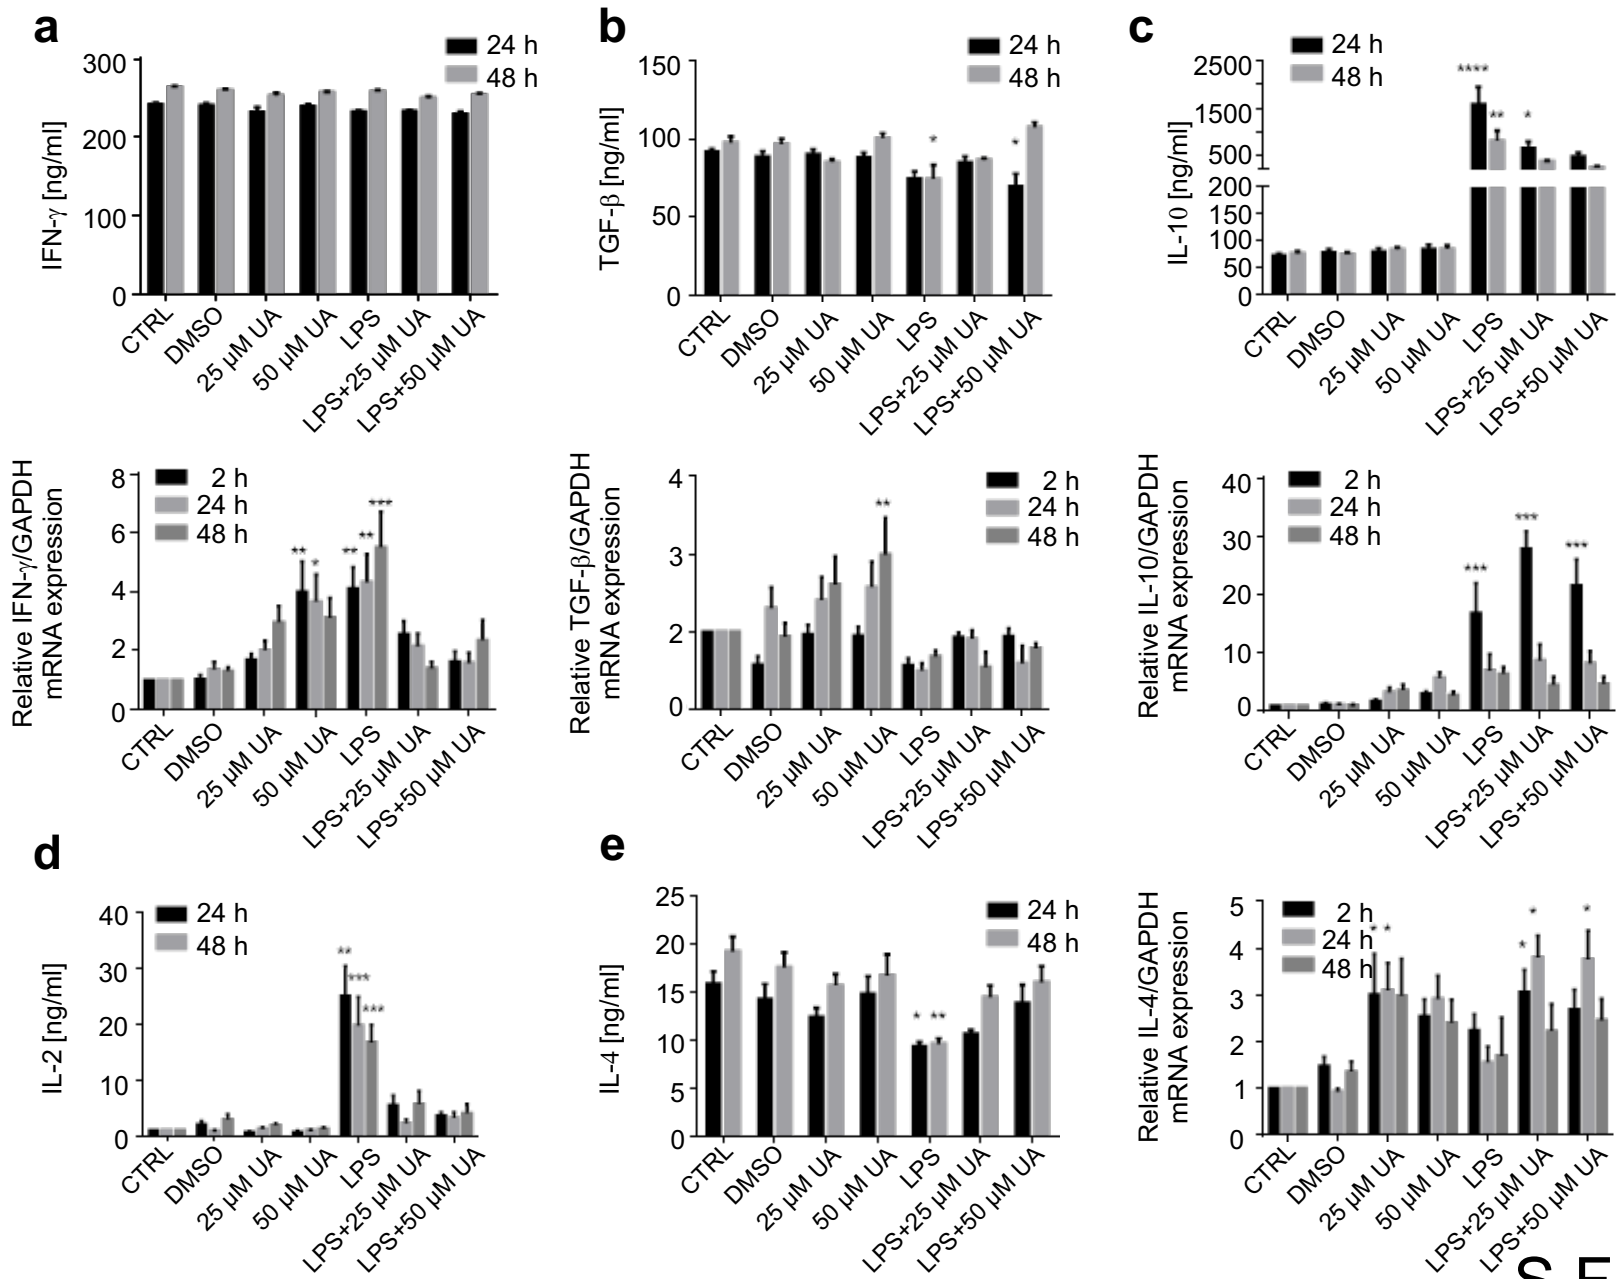

S Fig 3

**a**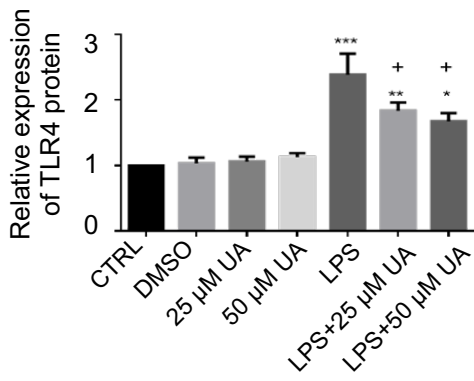**b**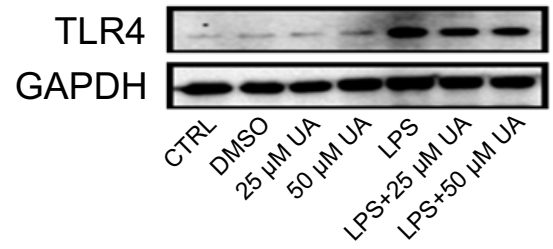

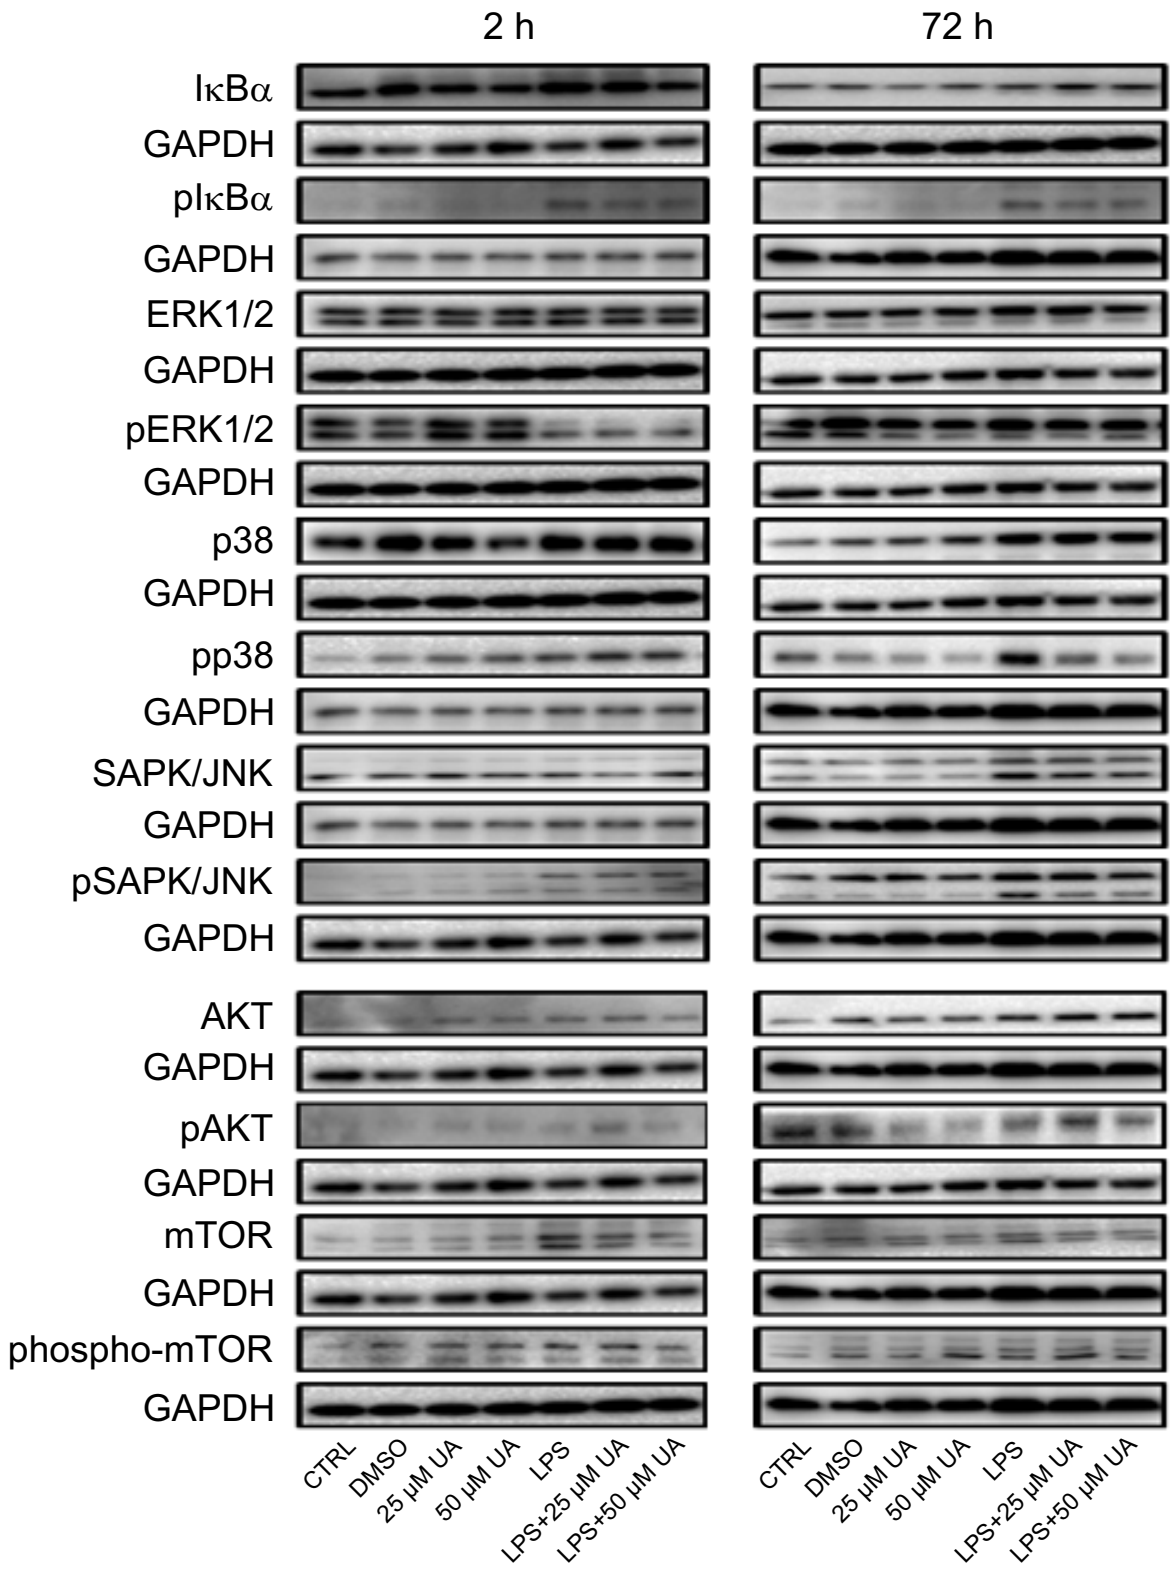

S Fig 5

**a**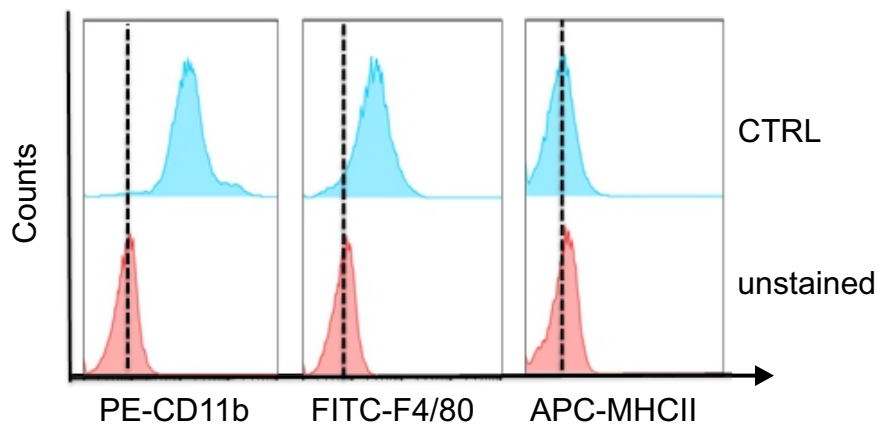**b**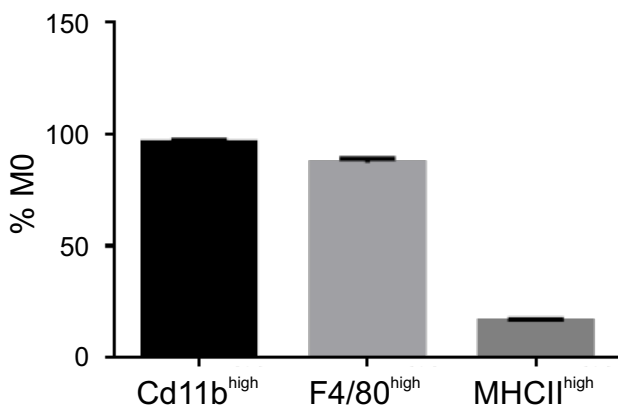

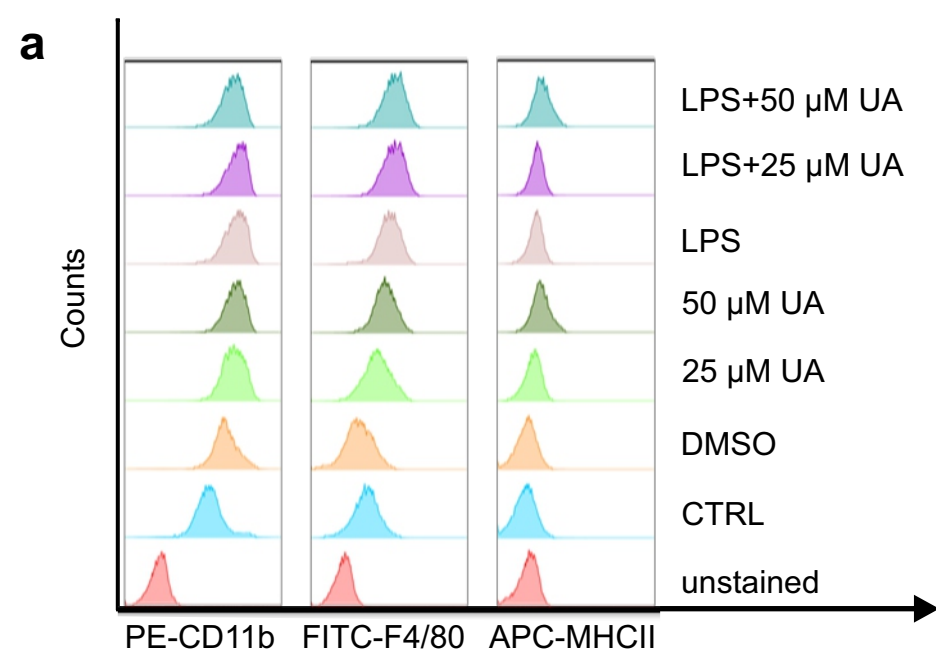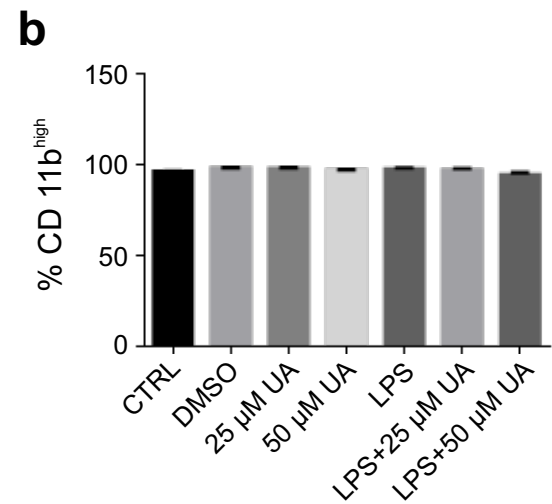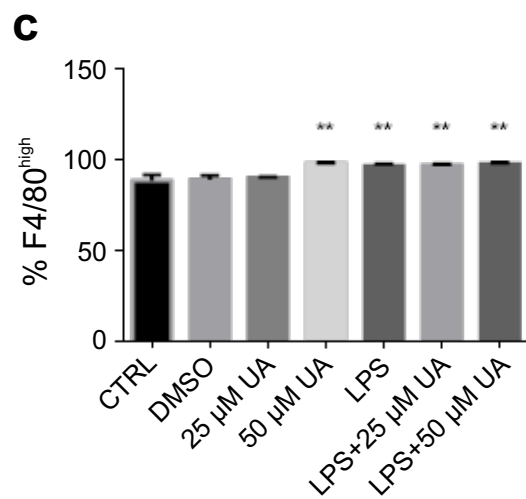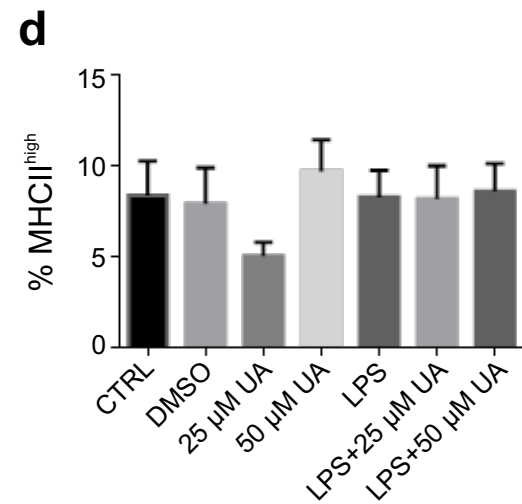



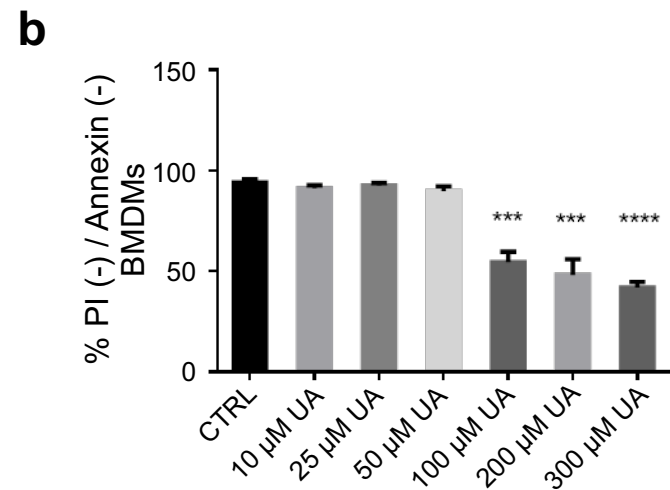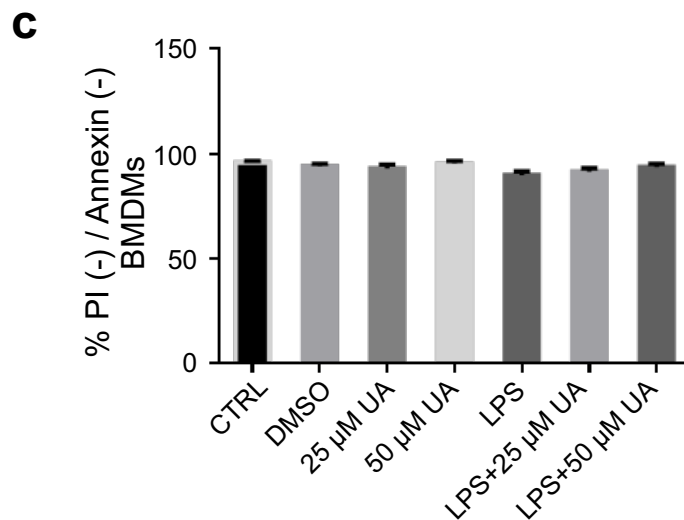

## Supplementary Figure Legends

### **Supplementary Figure 1 Effect of urolithin A or DMSO on superoxide production in murine BMDMs**

Murine BMDMs were treated either by UA (25  $\mu$ M or 50  $\mu$ M) or DMSO for 48h. Both DMSO and UA did not record any observable changes. Nuclei were counterstained with DAPI (blue). Scale bar represents 50  $\mu$ m. Murine BMDMs treated with DMSO were used as negative control. Abbreviations: DMSO, dimethyl sulfoxide; UA, urolithin A.

### **Supplementary Figure 2 Influence of urolithin A or DMSO on DSBs in murine BMDMs after 48h**

Murine BMDMs were treated either by UA (25  $\mu$ M or 50  $\mu$ M) or DMSO for 48h. Both UA and DMSO did not register any significant effect on DSBs after 48h. Nuclei were counterstained with DAPI (blue). Scale bar represents 50  $\mu$ m. BMDMs treated with DMSO were used as negative control. Abbreviations: DMSO, dimethyl sulfoxide; UA, urolithin A.

### **Supplementary Figure 3 Urolithin A reduces the inflammatory cytokine production and mRNA expression in LPS-stimulated murine BMDMs**

Murine BMDMs were stimulated by 1 $\mu$ g/ml of LPS in the presence or absence of UA (25  $\mu$ M or 50  $\mu$ M). Subsequently, expression of the inflammatory cytokines IFN- $\gamma$  (a), TGF $\beta$  (b), IL-10 (c), IL-2 (d), and IL-4 (e) were measured in BMDMs by qRT-PCR (over GAPDH) and ELISA at depicted time points. The unstimulated and untreated BMDMs were used as control. BMDMs treated with DMSO were used as negative control. Arithmetic means  $\pm$  SEM from seven independent experiments are depicted. Two way ANOVA was used and \* ( $p < 0.05$ ), \*\* ( $P < 0.01$ ), \*\*\* ( $p < 0.001$ ), and \*\*\*\* ( $p < 0.0001$ ) indicate statistically significant differences compared to respective control. Abbreviations: DMSO, dimethyl sulfoxide; UA, urolithin A; LPS, lipopolysaccharides; IL, Interleukin; GAPDH, glyceraldehyde 3-phosphate dehydrogenase; IFN, interferon gamma; TGF, transforming growth factor.

### **Supplementary Figure 4 Sensitivity of TLR4 expressions to urolithin A (UA) in LPS-stimulated murine BMDMs**

Murine BMDMs were stimulated by 1 $\mu$ g/ml of LPS in the presence or absence of UA (25  $\mu$ M or 50  $\mu$ M), then harvested and subjected to western blot after 72h. (a) Bar graph represents relative band intensities of TLR4 normalized to GAPDH. The unstimulated and untreated BMDMs were used as control. BMDMs treated with DMSO were used as negative control. (b) Representative image of TLR4 protein expression assessed by western blot analysis. Data are shown as means  $\pm$  SEM from four independent experiments. One way ANOVA was used and \* ( $p < 0.05$ ), \*\* ( $p < 0.001$ ), and \*\*\* ( $p < 0.001$ ) indicate statistically significant differences compared to untreated control. + ( $p < 0.05$ ) indicate statistically significant differences compared to LPS. Abbreviations: DMSO, dimethyl sulfoxide; LPS, lipopolysaccharides; UA, urolithin A; TLR, Toll like receptor; GAPDH, glyceraldehyde-3-phosphate dehydrogenase.

### **Supplementary Figure 5 Effect of urolithin A on I $\kappa$ B $\alpha$ , ERK1/2, p38, SAPK/JNK, AKT and mTOR expression and phosphorylation in LPS-stimulated murine BMDMs**

Murine BMDMs were stimulated by 1 $\mu$ g/ml of LPS in the presence or absence of UA (25  $\mu$ M or 50  $\mu$ M) and harvested at 2h and 72h followed by western blot analysis. (a) Phosphorylation of I $\kappa$ B $\alpha$ , ERK1/2, and AKT were monitored by immunoblot using pI $\kappa$ B $\alpha$  (Ser32/36) monoclonal antibodies, phospho-p44/42 MAP kinase (Thr202/Tyr204) polyclonal antibodies, and pAKT (Ser473) monoclonal antibodies. Subsequently, blots were stripped and re-incubated with antibodies against total I $\kappa$ B $\alpha$ , ERK1/2 and AKT. (b) Phosphorylation of p38, SAPK/JNK, and mTOR were monitored by immunoblot using phospho-p38 MAP kinase (Thr180/Tyr182), and phospho-SAPK/JNK MAP kinase (Thr183/Tyr185) and phospho-mTOR (Ser2448) monoclonal antibodies, respectively at depicted time points. Subsequently, blots of the same membrane were stripped and re-incubated with antibody against total p38, SAPK/JNK and mTOR. GAPDH served as a loading control. The unstimulated and untreated BMDMs were used as control. BMDMs treated with DMSO were used as negative control. Abbreviations: DMSO, dimethyl sulfoxide; LPS, lipopolysaccharides; UA, urolithin A; GAPDH, glyceraldehyde-3- phosphate dehydrogenase.

### **Supplementary Figure 6 FACS phenotyping of BMDMs**

Naive bone marrow cells were isolated and subsequently cultured for one week in DMEM complete media (M0) and then analyzed for macrophage markers. (a) FACS histogram displaying the harvested BMDMs (M0) which were defined as F4/80<sup>high</sup>, CD11b<sup>high</sup> and MHCII<sup>high</sup>. (b) Arithmetic means  $\pm$  SEM (n = 5) of percentage of the positive gated populations of M0.

### **Supplementary Figure 7 FACS phenotyping of BMDMs after 72h of stimulation**

Naive bone marrow cells were isolated and subsequently cultured for one week in DMEM complete media and then stimulated with 1 $\mu$ g/ml LPS in the presence or absence of UA (25  $\mu$ M or 50  $\mu$ M). (a) FACS histogram displaying the expression of macrophage marker after 72h of desired treatment using CD11b, F4/80 and MHCII. Arithmetic means  $\pm$  SEM (n = 5) of percentage of the positive gated populations of stimulated macrophages which were defined as CD11b<sup>high</sup> (b), F4/80<sup>high</sup> (c) and MHCII<sup>high</sup> (d). \* (p<0.05) and \*\* (P<0.001) indicates statistically significant difference compared to control. Abbreviations: DMSO, dimethyl sulfoxide; UA, urolithin A; RAD, radiation.

### **Supplementary Figure 8 Influence of urolithin A on the viability of LPS-stimulated murine BMDMs after 72h**

Naive bone marrow cells were isolated and subsequently cultured for one week in DMEM complete media and then stimulated with 1 $\mu$ g/ml LPS in the presence or absence of UA (25  $\mu$ M or 50  $\mu$ M). (a) Dot plots of mature BMDMs which were treated as indicated. After 72h the cell viability was measured by Annexin-V /PI compared to untreated control cells. (b) Arithmetic means  $\pm$  SEM (n = 5) of BMDMs which were treated with different concentrations of UA for 72h. (c) Values show the percentage of live BMDMs Annexin-V/PI after indicated treatments. Arithmetic means  $\pm$  SEM (n = 5). \*\*\* (P<0.001) and \*\*\*\* (P<0.0001) indicate statistically significant differences compared to control. Abbreviations: DMSO, dimethyl sulfoxide; UA, urolithin A; LPS, lipopolysaccharides.

## SUPPLEMENTARY TABLES

**Supplementary Table 1 The source of variation in intracellular calcium in LPS-stimulated or X-irradiated murine BMDMs**

| <b>Source of variation</b> | <b>% of total variation</b> | <b>F(DFn, DFd)</b>  | <b>P value</b> |
|----------------------------|-----------------------------|---------------------|----------------|
| Interaction                | 7.747                       | F (13, 145) = 1.645 | P = 0.0792     |
| Group factor               | 33.64                       | F (13, 145) = 7.144 | P < 0.0001     |
| Time factor                | 4.312                       | F (1, 145) = 11.91  | P = 0.0007     |

**Supplementary Table 2 The source of variation in  $\gamma$ H2AX phosphorylation in LPS-stimulated or X-irradiated murine BMDMs**

| <b>Source of variation</b> | <b>% of total variation</b> | <b>F (DFn, DFd)</b> | <b>P value</b> |
|----------------------------|-----------------------------|---------------------|----------------|
| Interaction                | 6.728                       | F (13, 318) = 2.730 | P = 0.0011     |
| Group factor               | 32.27                       | F (13, 318) = 13.09 | P < 0.0001     |
| Time factor                | 0.4730                      | F (1, 318) = 2.495  | P = 0.1152     |

**Supplementary Table 3 The source of variation in protein expression of TLR2 in LPS-stimulated or X-irradiated murine BMDMs**

| <b>Source of variation / TLR2</b> | <b>% of total variation</b> | <b>F (DFn, DFd)</b> | <b>P value</b> | <b>P value summary</b> |
|-----------------------------------|-----------------------------|---------------------|----------------|------------------------|
| Interaction                       | 15.61                       | F (36, 507) = 5.298 | P < 0.0001     | ****                   |
| Group factor                      | 39.95                       | F (12, 507) = 40.67 | P < 0.0001     | ****                   |
| Time factor                       | 1.481                       | F (3, 507) = 6.032  | P = 0.0005     | ***                    |

**Supplementary Table 4 The source of variation in protein expression and phosphorylation of ERK1/2 in LPS-stimulated or X-irradiated murine BMDMs**

| <b>Source of variation / pERK1/2 over GAPDH</b> | <b>% of total variation</b> | <b>F (DFn, DFd)</b> | <b>P value</b> | <b>P value summary</b> |
|-------------------------------------------------|-----------------------------|---------------------|----------------|------------------------|
| Interaction                                     | 42.83                       | F (36, 286) = 7.898 | P < 0.0001     | ****                   |
| Group factor                                    | 13.38                       | F (12, 286) = 7.402 | P < 0.0001     | ****                   |
| Time factor                                     | 0.5391                      | F (3, 286) = 1.193  | P = 0.3126     | ns                     |
| <b>Source of variation / ERK1/2 over GAPDH</b>  | <b>% of total variation</b> | <b>F (DFn, DFd)</b> | <b>P value</b> | <b>P value summary</b> |
| Interaction                                     | 20.60                       | F (36, 386) = 4.361 | P < 0.0001     | ****                   |
| Group factor                                    | 29.42                       | F (12, 386) = 18.68 | P < 0.0001     | ****                   |
| Time factor                                     | 2.287                       | F (3, 386) = 5.808  | P = 0.0007     | ***                    |
| <b>Source of variation / pERK1/2 over ERK</b>   | <b>% of total variation</b> | <b>F (DFn, DFd)</b> | <b>P value</b> | <b>P value summary</b> |
| Interaction                                     | 31.32                       | F (36, 260) = 3.921 | P < 0.0001     | ****                   |
| Group factor                                    | 9.705                       | F (12, 260) = 3.645 | P < 0.0001     | ****                   |
| Time factor                                     | 1.286                       | F (3, 260) = 1.931  | P = 0.1249     | ns                     |

**Supplementary Table 5 The source of variation in protein expression and phosphorylation of MAPK p38 in LPS-stimulated or X-irradiated murine BMDMs**

| <b>Source of variation / pp38 over GAPDH</b>      | <b>% of total variation</b> | <b>F (DFn, DFd)</b> | <b>P value</b> | <b>P value summary</b> |
|---------------------------------------------------|-----------------------------|---------------------|----------------|------------------------|
| Interaction                                       | 19.15                       | F (36, 351) = 4.448 | P < 0.0001     | ****                   |
| Group factor                                      | 26.46                       | F (12, 351) = 18.44 | P < 0.0001     | ****                   |
| Time factor                                       | 12.37                       | F (3, 351) = 34.48  | P < 0.0001     | ****                   |
| <b>Source of variation / p38 over GAPDH</b>       | <b>% of total variation</b> | <b>F (DFn, DFd)</b> | <b>P value</b> | <b>P value summary</b> |
| Interaction                                       | 27.15                       | F (36, 247) = 5.127 | P < 0.0001     | ****                   |
| Group factor                                      | 37.25                       | F (12, 247) = 21.10 | P < 0.0001     | ****                   |
| Time factor                                       | 1.456                       | F (3, 247) = 3.299  | P = 0.0211     | *                      |
| <b>Source of variation / phospho/p38 over p38</b> | <b>% of total variation</b> | <b>F (DFn, DFd)</b> | <b>P value</b> | <b>P value summary</b> |
| Interaction                                       | 29.43                       | F (36, 247) = 5.008 | P < 0.0001     | ****                   |
| Group factor                                      | 18.45                       | F (12, 247) = 9.419 | P < 0.0001     | ****                   |
| Time factor                                       | 10.60                       | F (3, 247) = 21.65  | P < 0.0001     | ****                   |

**Supplementary Table 6 The source of variation in protein expression and phosphorylation of MAPK SAPK/JNK in LPS-stimulated or X-irradiated murine BMDMs**

| <b>Source of variation / phospho-SAPK/JNK over GAPDH</b> | <b>% of total variation</b> | <b>F (DFn, DFd)</b> | <b>P value</b> | <b>P value summary</b> |
|----------------------------------------------------------|-----------------------------|---------------------|----------------|------------------------|
| Interaction                                              | 15.06                       | F (36, 273) = 3.122 | P < 0.0001     | ****                   |
| Group factor                                             | 45.48                       | F (12, 273) = 28.28 | P < 0.0001     | ****                   |
| Time factor                                              | 0.4262                      | F (3, 273) = 1.060  | P = 0.3665     | ns                     |
| <b>Source of variation / SAPK/JNK over GAPDH</b>         | <b>% of total variation</b> | <b>F (DFn, DFd)</b> | <b>P value</b> | <b>P value summary</b> |
| Interaction                                              | 6.266                       | F (36, 286) = 1.394 | P = 0.0740     | ns                     |
| Group factor                                             | 53.30                       | F (12, 286) = 35.57 | P < 0.0001     | ****                   |
| Time factor                                              | 2.454                       | F (3, 286) = 6.551  | P = 0.0003     | ***                    |
| <b>Source of variation / pSAPK/JNK over SAPK/JNK</b>     | <b>% of total variation</b> | <b>F (DFn, DFd)</b> | <b>P value</b> | <b>P value summary</b> |
| Interaction                                              | 20.37                       | F (36, 208) = 1.877 | P = 0.0034     | **                     |
| Group factor                                             | 13.73                       | F (12, 208) = 3.795 | P < 0.0001     | ****                   |
| Time factor                                              | 3.194                       | F (3, 208) = 3.531  | P = 0.0158     | *                      |

**Supplementary Table 7 The source of variation in protein expression of IκBα expression and phosphorylation in LPS-stimulated or X-irradiated murine BMDMs**

| <b>Source of variation / pIκBα over GAPDH</b> | <b>% of total variation</b> | <b>F (DFn, DFd)</b>  | <b>P value</b> | <b>P value summary</b> |
|-----------------------------------------------|-----------------------------|----------------------|----------------|------------------------|
| Interaction                                   | 3.277                       | F (36, 208) = 0.7886 | P = 0.8001     | ns                     |
| Group factor                                  | 71.94                       | F (12, 208) = 51.93  | P < 0.0001     | ****                   |
| Time factor                                   | 0.7713                      | F (3, 208) = 2.227   | P = 0.0861     | ns                     |
| <b>Source of variation / IκBα over GAPDH</b>  | <b>% of total variation</b> | <b>F (DFn, DFd)</b>  | <b>P value</b> | <b>P value summary</b> |
| Interaction                                   | 19.38                       | F (36, 208) = 4.482  | P < 0.0001     | ****                   |
| Group factor                                  | 46.84                       | F (12, 208) = 32.49  | P < 0.0001     | ****                   |
| Time factor                                   | 8.799                       | F (3, 208) = 24.42   | P < 0.0001     | ****                   |
| <b>Source of variation / pIκBα over IκBα</b>  | <b>% of total variation</b> | <b>F (DFn, DFd)</b>  | <b>P value</b> | <b>P value summary</b> |
| Interaction                                   | 16.26                       | F (36, 208) = 2.714  | P < 0.0001     | ****                   |
| Group factor                                  | 45.24                       | F (12, 208) = 22.65  | P < 0.0001     | ****                   |
| Time factor                                   | 3.884                       | F (3, 208) = 7.780   | P < 0.0001     | ****                   |

**Supplementary Table 8 The source of variation in protein expression and phosphorylation of AKT in LPS-stimulated or X-irradiated murine BMDMs**

| <b>Source of variation / pAKT over GAPDH</b> | <b>% of total variation</b> | <b>F (DFn, DFd)</b> | <b>P value</b> | <b>P value summary</b> |
|----------------------------------------------|-----------------------------|---------------------|----------------|------------------------|
| Interaction                                  | 29.06                       | F (36, 299) = 5.809 | P < 0.0001     | ****                   |
| Group factor                                 | 22.32                       | F (12, 299) = 13.39 | P < 0.0001     | ****                   |
| Time factor                                  | 8.092                       | F (3, 299) = 19.41  | P < 0.0001     | ****                   |
| <b>Source of variation / AKT over GAPDH</b>  | <b>% of total variation</b> | <b>F (DFn, DFd)</b> | <b>P value</b> | <b>P value summary</b> |
| Interaction                                  | 15.74                       | F (36, 312) = 4.524 | P < 0.0001     | ****                   |
| Group factor                                 | 46.02                       | F (12, 312) = 39.68 | P < 0.0001     | ****                   |
| Time factor                                  | 8.075                       | F (3, 312) = 27.84  | P < 0.0001     | ****                   |
| <b>Source of variation / pAKT over AKT</b>   | <b>% of total variation</b> | <b>F (DFn, DFd)</b> | <b>P value</b> | <b>P value summary</b> |
| Interaction                                  | 25.51                       | F (36, 299) = 5.331 | P < 0.0001     | ****                   |
| Group factor                                 | 15.43                       | F (12, 299) = 9.674 | P < 0.0001     | ****                   |
| Time factor                                  | 19.95                       | F (3, 299) = 50.05  | P < 0.0001     | ****                   |

**Supplementary Table 9 The source of variation in protein expression and phosphorylation of mTOR in LPS-stimulated or X-irradiated murine BMDMs**

| <b>Source of variation / phospho-mTOR over GAPDH</b> | <b>% of total variation</b> | <b>F (DFn, DFd)</b> | <b>P value</b> | <b>P value summary</b> |
|------------------------------------------------------|-----------------------------|---------------------|----------------|------------------------|
| Interaction                                          | 15.42                       | F (36, 387) = 3.499 | P < 0.0001     | ****                   |
| Group factor                                         | 30.73                       | F (12, 387) = 20.92 | P < 0.0001     | ****                   |
| Time factor                                          | 6.764                       | F (3, 387) = 18.41  | P < 0.0001     | ****                   |
| <b>Source of variation / mTOR over GAPDH</b>         | <b>% of total variation</b> | <b>F (DFn, DFd)</b> | <b>P value</b> | <b>P value summary</b> |
| Interaction                                          | 13.69                       | F (36, 351) = 3.984 | P < 0.0001     | ****                   |
| Group factor                                         | 50.05                       | F (12, 351) = 43.70 | P < 0.0001     | ****                   |
| Time factor                                          | 3.277                       | F (3, 351) = 11.44  | P < 0.0001     | ****                   |
| <b>Source of variation / phospho-mTOR over mTOR</b>  | <b>% of total variation</b> | <b>F (DFn, DFd)</b> | <b>P value</b> | <b>P value summary</b> |
| Interaction                                          | 27.85                       | F (36, 351) = 7.738 | P < 0.0001     | ****                   |
| Group factor                                         | 24.93                       | F (12, 351) = 20.78 | P < 0.0001     | ****                   |
| Time factor                                          | 14.17                       | F (3, 351) = 47.24  | P < 0.0001     | ****                   |

**Supplementary Table 10 The source of variation of pro-inflammatory cytokine mRNA expression in LPS-stimulated or X-irradiated murine BMDMs**

| <b>Source of variation / IL-1<math>\beta</math></b>  | <b>% of total variation</b> | <b>F (DFn, DFd)</b>  | <b>P value</b> | <b>P value summary</b> |
|------------------------------------------------------|-----------------------------|----------------------|----------------|------------------------|
| Interaction                                          | 24.47                       | F (26, 166) = 49.58  | P < 0.0001     | ****                   |
| Group factor                                         | 68.95                       | F (13, 166) = 279.4  | P < 0.0001     | ****                   |
| Time factor                                          | 3.339                       | F (2, 166) = 87.96   | P < 0.0001     | ****                   |
| <b>Source of variation / IL-2</b>                    | <b>% of total variation</b> | <b>F (DFn, DFd)</b>  | <b>P value</b> | <b>P value summary</b> |
| Interaction                                          | 3.335                       | F (26, 192) = 0.8858 | P = 0.6283     | ns                     |
| Group factor                                         | 66.63                       | F (13, 192) = 35.40  | P < 0.0001     | ****                   |
| Time factor                                          | 1.049                       | F (2, 192) = 3.624   | P = 0.0285     | *                      |
| <b>Source of variation / IL-6</b>                    | <b>% of total variation</b> | <b>F (DFn, DFd)</b>  | <b>P value</b> | <b>P value summary</b> |
| Interaction                                          | 44.60                       | F (26, 252) = 51.81  | P < 0.0001     | ****                   |
| Group factor                                         | 38.68                       | F (13, 252) = 89.86  | P < 0.0001     | ****                   |
| Time factor                                          | 8.371                       | F (2, 252) = 126.4   | P < 0.0001     | ****                   |
| <b>Source of variation / IL-12</b>                   | <b>% of total variation</b> | <b>F (DFn, DFd)</b>  | <b>P value</b> | <b>P value summary</b> |
| Interaction                                          | 21.03                       | F (26, 230) = 4.485  | P < 0.0001     | ****                   |
| Group factor                                         | 37.76                       | F (13, 230) = 16.11  | P < 0.0001     | ****                   |
| Time factor                                          | 4.157                       | F (2, 230) = 11.53   | P < 0.0001     | ****                   |
| <b>Source of variation / TNF-<math>\alpha</math></b> | <b>% of total variation</b> | <b>F (DFn, DFd)</b>  | <b>P value</b> | <b>P value summary</b> |
| Interaction                                          | 36.46                       | F (26, 246) = 34.51  | P < 0.0001     | ****                   |
| Group factor                                         | 46.95                       | F (13, 246) = 88.90  | P < 0.0001     | ****                   |
| Time factor                                          | 6.413                       | F (2, 246) = 78.93   | P < 0.0001     | ****                   |



**Supplementary Table 11 The source of variation in anti-inflammatory cytokine mRNA expression in LPS-stimulated or X-irradiated murine BMDMs**

| <b>Source of variation / IL-4</b>                    | <b>% of total variation</b> | <b>F (DFn, DFd)</b>  | <b>P value</b> | <b>P value summary</b> |
|------------------------------------------------------|-----------------------------|----------------------|----------------|------------------------|
| Interaction                                          | 23.18                       | F (26, 259) = 6.454  | P < 0.0001     | ****                   |
| Group factor                                         | 30.00                       | F (13, 259) = 16.71  | P < 0.0001     | ****                   |
| Time factor                                          | 11.90                       | F (2, 259) = 43.07   | P < 0.0001     | ****                   |
| <b>Source of variation / IL-10</b>                   | <b>% of total variation</b> | <b>F (DFn, DFd)</b>  | <b>P value</b> | <b>P value summary</b> |
| Interaction                                          | 23.35                       | F (26, 235) = 4.678  | P < 0.0001     | ****                   |
| Group factor                                         | 24.39                       | F (13, 235) = 9.770  | P < 0.0001     | ****                   |
| Time factor                                          | 6.672                       | F (2, 235) = 17.37   | P < 0.0001     | ****                   |
| <b>Source of variation / TGF-<math>\beta</math></b>  | <b>% of total variation</b> | <b>F (DFn, DFd)</b>  | <b>P value</b> | <b>P value summary</b> |
| Interaction                                          | 2.195                       | F (26, 248) = 0.4064 | P = 0.9960     | ns                     |
| Group factor                                         | 46.23                       | F (13, 248) = 17.12  | P < 0.0001     | ****                   |
| Time factor                                          | 0.05814                     | F (2, 248) = 0.1399  | P = 0.8695     | ns                     |
| <b>Source of variation / IFN-<math>\gamma</math></b> | <b>% of total variation</b> | <b>F (DFn, DFd)</b>  | <b>P value</b> | <b>P value summary</b> |
| Interaction                                          | 3.315                       | F (26, 239) = 0.5017 | P = 0.9808     | ns                     |
| Group factor                                         | 33.54                       | F (13, 239) = 10.15  | P < 0.0001     | ****                   |
| Time factor                                          | 0.05949                     | F (2, 239) = 0.1170  | P = 0.8896     | ns                     |
| <b>Source of variation / NOS2</b>                    | <b>% of total variation</b> | <b>F (DFn, DFd)</b>  | <b>P value</b> | <b>P value summary</b> |
| Interaction                                          | 27.23                       | F (26, 243) = 103.5  | P < 0.0001     | ****                   |
| Group factor                                         | 68.19                       | F (13, 243) = 518.4  | P < 0.0001     | ****                   |
| Time factor                                          | 1.943                       | F (2, 243) = 95.99   | P < 0.0001     | ****                   |

**Supplementary Table 12 The source of variation of pro-inflammatory cytokines production in LPS-stimulated or X-irradiated murine BMDMs**

| <b>Source of variation / IL-1<math>\beta</math></b>  | <b>% of total variation</b> | <b>F (DFn, DFd)</b>  | <b>P value</b> | <b>P value summary</b> |
|------------------------------------------------------|-----------------------------|----------------------|----------------|------------------------|
| Interaction                                          | 10.39                       | F (12, 156) = 5.966  | P < 0.0001     | ****                   |
| Group factor                                         | 66.12                       | F (12, 156) = 37.96  | P < 0.0001     | ****                   |
| Time factor                                          | 0.8422                      | F (1, 156) = 5.802   | P = 0.0172     | *                      |
| <b>Source of variation / IL-6</b>                    | <b>% of total variation</b> | <b>F (DFn, DFd)</b>  | <b>P value</b> | <b>P value summary</b> |
| Interaction                                          | 2.344                       | F (13, 168) = 1.764  | P = 0.0525     | ns                     |
| Group factor                                         | 80.47                       | F (13, 168) = 60.56  | P < 0.0001     | ****                   |
| Time factor                                          | 0.01169                     | F (1, 168) = 0.1144  | P = 0.7356     | ns                     |
| <b>Source of variation / IL-12</b>                   | <b>% of total variation</b> | <b>F (DFn, DFd)</b>  | <b>P value</b> | <b>P value summary</b> |
| Interaction                                          | 2.439                       | F (13, 166) = 0.5166 | P = 0.9122     | ns                     |
| Group factor                                         | 35.28                       | F (13, 166) = 7.472  | P < 0.0001     | ****                   |
| Time factor                                          | 1.956                       | F (1, 166) = 5.386   | P = 0.0215     | *                      |
| <b>Source of variation / TNF-<math>\alpha</math></b> | <b>% of total variation</b> | <b>F (DFn, DFd)</b>  | <b>P value</b> | <b>P value summary</b> |
| Interaction                                          | 16.29                       | F (13, 168) = 29.95  | P < 0.0001     | ****                   |
| Group factor                                         | 73.38                       | F (13, 168) = 134.9  | P < 0.0001     | ****                   |
| Time factor                                          | 3.299                       | F (1, 168) = 78.83   | P < 0.0001     | ****                   |

**Supplementary Table 13 The source of variation of anti-inflammatory cytokines production in LPS-stimulated or X-irradiated BMDMs**

| <b>Source of variation/<br/>IL-4</b>                    | <b>% of total<br/>variation</b> | <b>F (DFn, DFd)</b>    | <b>P value</b> | <b>P value<br/>summary</b> |
|---------------------------------------------------------|---------------------------------|------------------------|----------------|----------------------------|
| Interaction                                             | 7.409                           | F (13, 168) =<br>1.965 | P = 0.0265     | *                          |
| Group factor                                            | 33.41                           | F (13, 168) =<br>8.861 | P < 0.0001     | ****                       |
| Time factor                                             | 10.46                           | F (1, 168) = 36.07     | P < 0.0001     | ****                       |
| <b>Source of variation/<br/>IL-10</b>                   | <b>% of total<br/>variation</b> | <b>F (DFn, DFd)</b>    | <b>P value</b> | <b>P value<br/>summary</b> |
| Interaction                                             | 7.302                           | F (13, 168) =<br>3.094 | P = 0.0004     | ***                        |
| Group factor                                            | 60.59                           | F (13, 168) =<br>25.68 | P < 0.0001     | ****                       |
| Time factor                                             | 1.609                           | F (1, 168) = 8.866     | P = 0.0033     | **                         |
| <b>Source of variation/<br/>TGF-<math>\beta</math></b>  | <b>% of total<br/>variation</b> | <b>F (DFn, DFd)</b>    | <b>P value</b> | <b>P value<br/>summary</b> |
| Interaction                                             | 17.89                           | F (13, 168) =<br>3.691 | P < 0.0001     | ****                       |
| Group factor                                            | 15.77                           | F (13, 168) =<br>3.253 | P = 0.0002     | ***                        |
| Time factor                                             | 3.698                           | F (1, 168) = 9.917     | P = 0.0019     | **                         |
| <b>Source of variation/<br/>IFN-<math>\gamma</math></b> | <b>% of total<br/>variation</b> | <b>F (DFn, DFd)</b>    | <b>P value</b> | <b>P value<br/>summary</b> |
| Interaction                                             | 4.273                           | F (13, 168) =<br>2.040 | P = 0.0203     | *                          |
| Group factor                                            | 27.07                           | F (13, 168) =<br>12.92 | P < 0.0001     | ****                       |
| Time factor                                             | 41.59                           | F (1, 168) = 258.1     | P < 0.0001     | ****                       |

## Supplementary western blots (whole bands)

In this project only **the first seven bands** were used and the other bands belong to another project.

- Prosieve ladder 300 kda (Lonza) was used (see image below).
- Usually the membrane was cut at 70 kda and the upper part was used for TLR4, mTOR, phospho-mTOR and the lower part for the other depicted proteins.
- The membrane was first incubated with antibodies against the phospho-protein, then stripped and controlled, blocked and incubated with the antibodies against the total protein.
- Either phospho- or total proteins were controlled to their corresponding GAPDH.

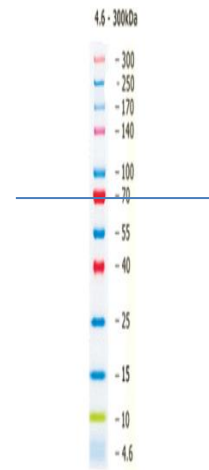

A

1- TLR4

|       |                                                                                    |
|-------|------------------------------------------------------------------------------------|
| 72h   |                                                                                    |
| TLR4  |  |
| GAPDH |  |
|       |                                                                                    |

**2- ERK1/2**

|     |         |                                                                                     |                                                                                                             |  |
|-----|---------|-------------------------------------------------------------------------------------|-------------------------------------------------------------------------------------------------------------|--|
| 2h  | ERK1/2  | 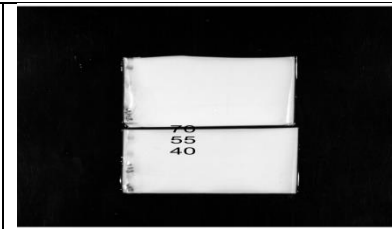   |  <p>ERK1/2<br/>2h</p>     |  |
|     |         |    |  <p>gapdh<br/>2h</p>      |  |
|     | pERK1/2 |    |  <p>pERK1/2<br/>2h</p>    |  |
|     | GAPDH   |   |  <p>gapdh<br/>2h</p>     |  |
| 24h |         |                                                                                     |                                                                                                             |  |
|     | ERK1/2  |  |  <p>ERK1/2<br/>24h</p>  |  |
|     | pERK1/2 |  |  <p>pERK1/2<br/>24h</p> |  |
|     | GAPDH   |  |  <p>gapdh<br/>24h</p>   |  |
|     |         |                                                                                     |                                                                                                             |  |

|     |         |                                                                                     |                                                                                      |
|-----|---------|-------------------------------------------------------------------------------------|--------------------------------------------------------------------------------------|
| 48h |         |                                                                                     |                                                                                      |
|     | ERK1/2  |    |    |
|     | pERK1/2 |    |    |
|     | GAPDH   |    |    |
| 72h |         |                                                                                     |                                                                                      |
|     | ERK1/2  |   |   |
|     | pERK1/2 |  |  |
|     | GAPDH   |  |  |

### 3- p38

|     |       |                                                                                     |                                                                                      |
|-----|-------|-------------------------------------------------------------------------------------|--------------------------------------------------------------------------------------|
| 2h  |       |                                                                                     |                                                                                      |
|     | p38   | 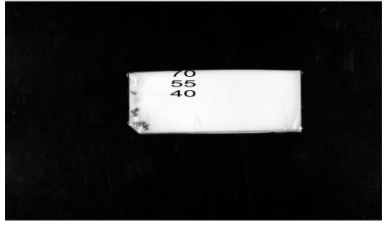   |    |
|     | GAPDH |    |    |
|     | pp38  |    |    |
|     | GAPDH |   |   |
| 24h |       |                                                                                     |                                                                                      |
|     | p38   |  |  |
|     | GAPDH |  |  |



|     |       |                                                                                     |                                                                                      |  |
|-----|-------|-------------------------------------------------------------------------------------|--------------------------------------------------------------------------------------|--|
|     | pp38  |    |    |  |
|     | GAPDH |    |    |  |
| 48h |       |                                                                                     |                                                                                      |  |
|     | p38   |    |    |  |
|     | GAPDH |   |   |  |
|     | pp38  |  |  |  |
|     | GAPDH |  |  |  |
| 72h |       |                                                                                     |                                                                                      |  |

|  |       |                                                                                    |                                                                                     |
|--|-------|------------------------------------------------------------------------------------|-------------------------------------------------------------------------------------|
|  | p38   |   |   |
|  | GAPDH |   |   |
|  | pp38  |   |   |
|  | GAPDH |  |  |

## 4- SAPK/JNK

|     |           |                                                                                     |                                                                                                       |
|-----|-----------|-------------------------------------------------------------------------------------|-------------------------------------------------------------------------------------------------------|
| 2h  | SAPK/JNK  |    |  SAPK/JNK<br>2h     |
|     | GAPDH     |    |  GAPDH<br>2h        |
|     | pSAPK/JNK |    |  pSAPK/JNK<br>2h    |
|     | GAPDH     |   |  gapdh<br>2h      |
| 24h |           |                                                                                     |                                                                                                       |
|     | SAPK/JNK  |  |  SAPK/jnk<br>24h  |
|     | GAPDH     |  |  gapdh<br>24h     |
|     | pSAPK/JNK |  |  pSAPK/JNK<br>24h |

|     |           |                                                                                     |                                                                                                    |
|-----|-----------|-------------------------------------------------------------------------------------|----------------------------------------------------------------------------------------------------|
|     | GAPDH     | 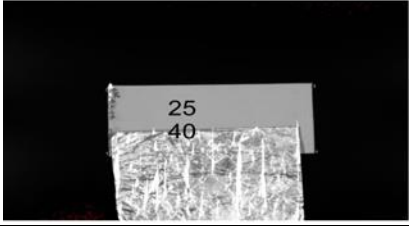   |  gapdh 24h       |
| 48h |           |                                                                                     |                                                                                                    |
|     | SAPK/JNK  |    |  SAPK/JNK 48h    |
|     | pSAPK/JNK |    |  pSAPK/JNK 48h   |
|     | GAPDH     |   |  gapdh 48h      |
| 72h |           |                                                                                     |                                                                                                    |
|     | SAPK/JNK  |  |  SAPK/JNK 72h  |
|     | pSAPK/JNK |  |  pSAPK/JNK 72h |
|     | GAPDH     |  |  gapdh 72h     |

## 5- I $\kappa$ B $\alpha$

|     |                        |                                                                                     |                                                                                      |
|-----|------------------------|-------------------------------------------------------------------------------------|--------------------------------------------------------------------------------------|
| 2h  |                        |                                                                                     |                                                                                      |
|     | I $\kappa$ B $\alpha$  | 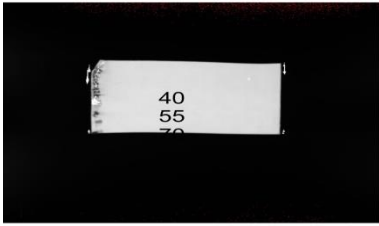   |    |
|     | GAPDH                  |    |    |
|     | pI $\kappa$ B $\alpha$ |    |    |
|     | GAPDH                  |   |   |
| 24h |                        |                                                                                     |                                                                                      |
|     | I $\kappa$ B $\alpha$  |  |  |
|     | GAPDH                  |  |  |
|     | pI $\kappa$ B $\alpha$ |  |  |

|     |                        |                                                                                     |                                                                                      |
|-----|------------------------|-------------------------------------------------------------------------------------|--------------------------------------------------------------------------------------|
|     | GAPDH                  |    |    |
| 48h |                        |                                                                                     |                                                                                      |
|     | I $\kappa$ B $\alpha$  |    |    |
|     | GAPDH                  |    |    |
|     | pI $\kappa$ B $\alpha$ |   |   |
|     | GAPDH                  |  |  |
| 72h |                        |                                                                                     |                                                                                      |
|     | I $\kappa$ B $\alpha$  |  |  |
|     | GAPDH                  |  |  |

|  |                                |                                                                                   |                                                                                                                           |  |
|--|--------------------------------|-----------------------------------------------------------------------------------|---------------------------------------------------------------------------------------------------------------------------|--|
|  | <p>plkB<math>\alpha</math></p> |  |  <p>plkB<math>\alpha</math><br/>72h</p> |  |
|  | <p>GAPDH</p>                   |  |  <p>gapdh<br/>72h</p>                   |  |

# 6- AKT

|     |       |                                                                                     |                                                                                                  |
|-----|-------|-------------------------------------------------------------------------------------|--------------------------------------------------------------------------------------------------|
| 2h  |       |                                                                                     |                                                                                                  |
|     | AKT   | 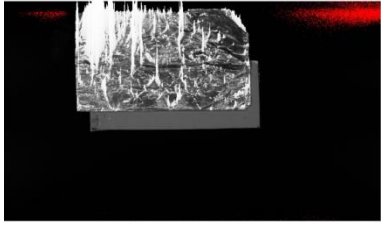   |  AKT<br>2h     |
|     | GAPDH |    |  gapdh<br>2h   |
|     | pAKT  |    |  pAKT<br>2h    |
|     | GAPDH |   |  gapdh<br>2h  |
| 24h |       |                                                                                     |                                                                                                  |
|     | AKT   |  |  AKT<br>24h  |
|     | GAPDH |  |  gapdh 24h   |
|     | pAKT  |  |  pAKT<br>24h |



|     |       |                                                                                     |                                                                                                   |
|-----|-------|-------------------------------------------------------------------------------------|---------------------------------------------------------------------------------------------------|
|     | GAPDH | 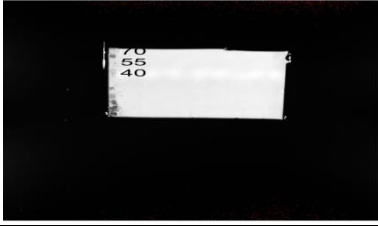   |  gapdh<br>24h   |
| 48h |       |                                                                                     |                                                                                                   |
|     | AKT   |    |  AKT 48h        |
|     | GAPDH |    |  gapdh<br>48h   |
|     | pAKT  |   |  pAKT<br>48h   |
|     | GAPDH |  |  gapdh 48h    |
| 72h |       |                                                                                     |                                                                                                   |
|     | AKT   |  |  AKT<br>72h   |
|     | GAPDH |  |  gapdh<br>72h |

|  |       |                                                                                   |                                                                                                        |  |
|--|-------|-----------------------------------------------------------------------------------|--------------------------------------------------------------------------------------------------------|--|
|  | pAKT  | 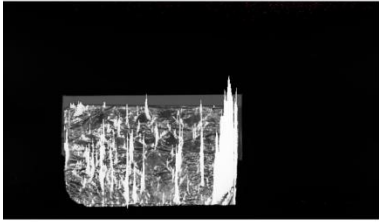 |  <p>pAKT<br/>72h</p> |  |
|  | GAPDH |  |  <p>gapdh 72h</p>    |  |

## 7- mTOR

|     |       |                                                                                     |                                                                                                       |
|-----|-------|-------------------------------------------------------------------------------------|-------------------------------------------------------------------------------------------------------|
| 2h  |       |                                                                                     |                                                                                                       |
|     | mTOR  |    |  mTOR<br>2h         |
|     | GAPDH |    |  gapdh<br>2h        |
|     | pmTOR |    |  phospho-mTOR<br>2h |
|     | GAPDH |   |  gapdh<br>2h       |
| 24h |       |                                                                                     |                                                                                                       |
|     | mTOR  |  |  mTOR<br>24h      |
|     | GAPDH |  |  gapdh<br>24h     |
|     | pmTOR |  |  pmTOR<br>24h     |

|     |       |                                                                                     |                                                                                      |                  |
|-----|-------|-------------------------------------------------------------------------------------|--------------------------------------------------------------------------------------|------------------|
|     | GAPDH |    |    | gapdh<br>24h     |
| 48h |       |                                                                                     |                                                                                      |                  |
|     | mTOR  |    |    | mTOR<br>48h      |
|     | GAPDH |    |    | gapdh<br>48h     |
|     | pmTOR |   |   | phospho-mTOR 48h |
|     | GAPDH |  |  | gapdh<br>48h     |
| 72h |       |                                                                                     |                                                                                      |                  |
|     | mTOR  |  |  | mTOR 72h         |
|     | GAPDH |  |  | gapdh<br>72h     |

|  |       |                                                                                   |                                                                                    |
|--|-------|-----------------------------------------------------------------------------------|------------------------------------------------------------------------------------|
|  | pmTOR | 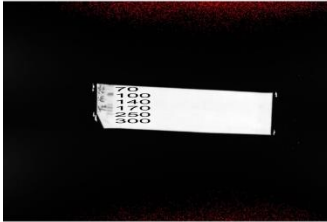 |  |
|  | GAPDH |  |  |

## B

### 1. TLR4

|       |                                                                                    |     |
|-------|------------------------------------------------------------------------------------|-----|
| TLR4  | 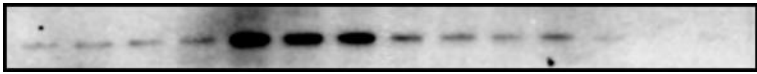 | 72h |
| GAPDH |  |     |

## 2. ERK1/2

|         |                                                                                      |     |
|---------|--------------------------------------------------------------------------------------|-----|
| ERK1/2  | 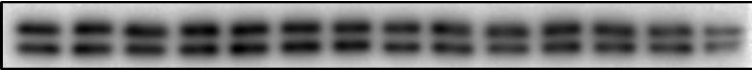   | 2h  |
| GAPDH   |    |     |
| pERK1/2 |    |     |
| GAPDH   |    |     |
|         |                                                                                      |     |
| ERK1/2  |    | 24h |
| GAPDH   |    |     |
| pERK1/2 |    |     |
| GAPDH   |    |     |
|         |                                                                                      |     |
| ERK1/2  |   | 48h |
| GAPDH   |  |     |
| pERK1/2 |  |     |
| GAPDH   |  |     |
|         |                                                                                      |     |
| ERK1/2  |  | 72h |
| GAPDH   |  |     |
| pERK1/2 |  |     |
| GAPDH   |  |     |

**3. p38**

|       |                                                                                      |     |
|-------|--------------------------------------------------------------------------------------|-----|
| p38   | 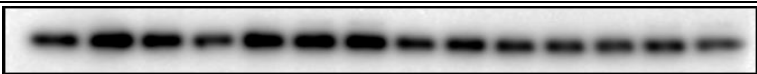   | 2h  |
| GAPDH |    |     |
| pp38  |    |     |
| GAPDH |    |     |
|       |                                                                                      |     |
| p38   |    | 24h |
| GAPDH |    |     |
| pp38  |    |     |
| GAPDH |    |     |
|       |                                                                                      |     |
| p38   |   | 48h |
| GAPDH |  |     |
| pp38  |  |     |
| GAPDH |  |     |
|       |                                                                                      |     |
| p38   |  | 72h |
| GAPDH |  |     |
| pp38  |  |     |
| GAPDH |  |     |



#### 4. SAPK/JNK

|           |                                                                                      |     |
|-----------|--------------------------------------------------------------------------------------|-----|
| SAPK/JNK  | 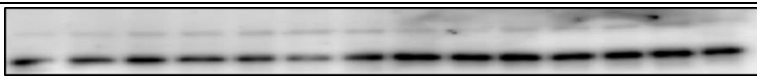   | 2h  |
| GAPDH     |    |     |
| pSAPK/JNK |    |     |
| GAPDH     |    |     |
|           |                                                                                      |     |
| SAPK/JNK  |    | 24h |
| GAPDH     |    |     |
| pSAPK/JNK |    |     |
| GAPDH     |    |     |
|           |                                                                                      |     |
| SAPK/JNK  |   | 48h |
| GAPDH     |  |     |
| pSAPK/JNK |  |     |
| GAPDH     |  |     |
|           |                                                                                      |     |
| SAPK/JNK  |  | 72h |
| GAPDH     |  |     |
| pSAPK/JNK |  |     |
| GAPDH     |  |     |

## 5. I $\kappa$ B $\alpha$

|                        |                                                                                      |  |     |
|------------------------|--------------------------------------------------------------------------------------|--|-----|
| I $\kappa$ B $\alpha$  |                                                                                      |  | 2h  |
| I $\kappa$ B $\alpha$  | 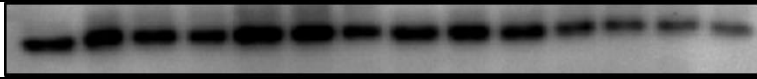   |  |     |
| GAPDH                  |    |  |     |
| pI $\kappa$ B $\alpha$ |    |  |     |
| GAPDH                  |    |  |     |
| I $\kappa$ B $\alpha$  |                                                                                      |  | 24h |
| I $\kappa$ B $\alpha$  |    |  |     |
| GAPDH                  |    |  |     |
| pI $\kappa$ B $\alpha$ |    |  |     |
| GAPDH                  |    |  |     |
| I $\kappa$ B $\alpha$  |                                                                                      |  | 48h |
| I $\kappa$ B $\alpha$  |   |  |     |
| GAPDH                  |  |  |     |
| pI $\kappa$ B $\alpha$ |  |  |     |
| GAPDH                  |  |  |     |
| I $\kappa$ B $\alpha$  |                                                                                      |  | 72h |
| I $\kappa$ B $\alpha$  |  |  |     |
| GAPDH                  |  |  |     |
| pI $\kappa$ B $\alpha$ |  |  |     |
| GAPDH                  |  |  |     |

# 6. AKT

|       |  |     |
|-------|--|-----|
| AKT   |  | 2h  |
| GAPDH |  |     |
| pAKT  |  |     |
| GAPDH |  |     |
| AKT   |  | 24h |
| GAPDH |  |     |
| pAKT  |  |     |
| GAPDH |  |     |
| AKT   |  | 48h |
| GAPDH |  |     |
| pAKT  |  |     |
| GAPDH |  |     |
| AKT   |  | 72h |
| GAPDH |  |     |
| pAKT  |  |     |
| GAPDH |  |     |

## 7. mTOR

|              |                                                                                      |     |
|--------------|--------------------------------------------------------------------------------------|-----|
| mTOR         | 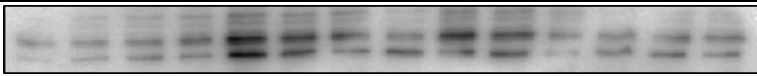   | 2h  |
| GAPDH        |    |     |
| Phospho-mTOR |    |     |
| GAPDH        |    |     |
| mTOR         |    | 24h |
| GAPDH        |    |     |
| Phospho-mTOR |    |     |
| GAPDH        |    |     |
| mTOR         |   | 48h |
| GAPDH        |  |     |
| Phospho-mTOR |  |     |
| GAPDH        |  |     |
| mTOR         |  | 72h |
| GAPDH        |  |     |
| Phospho-mTOR |  |     |
| GAPDH        |  |     |
